# Supplementary material for: Platelet count, aspirin use, and characteristics of host inflammatory responses in colorectal cancer
Source: Springer Nature journal article supplement (doi:10.1186/s12967-019-1950-z), 2019-06-13
Supplement: MOESM1 [file 16807728]

## **Additional file 1. Additional Tables S1–S6 and Figures S1–S3**

### **Platelet count, aspirin use, and characteristics of host inflammatory responses in colorectal cancer**

Juha P. Väyrynen<sup>1,2</sup>, Sara A. Väyrynen<sup>1,3</sup>, Päivi Sirniö<sup>1</sup>, Ilkka Minkkinen<sup>1</sup>, Kai Klintrup<sup>4</sup>, Toni Karhu<sup>5</sup>, Jyrki Mäkelä<sup>4</sup>, Karl-Heinz Herzig<sup>5,6</sup>, Tuomo J. Karttunen<sup>1</sup>, Anne Tuomisto<sup>1</sup>, Markus J. Mäkinen<sup>1</sup>

<sup>1</sup> Cancer and Translational Medicine Research Unit, University of Oulu, POB 5000, Oulu 90014, Finland; Finland; Department of Pathology, Oulu University Hospital and Medical Research Center Oulu, Oulu, POB 21, Oulu 90029, Finland

<sup>2</sup> Department of Oncologic Pathology, Dana-Farber Cancer Institute and Harvard Medical School, 450 Brookline Ave, Boston, MA 02215, USA

<sup>3</sup> Department of Medical Oncology, Dana-Farber Cancer Institute and Harvard Medical School, 450 Brookline Ave, Boston, MA 02215, USA

<sup>4</sup> Research Unit of Surgery, Anesthesia and Intensive Care, University of Oulu, POB 5000, Oulu 90014, Finland; Department of Surgery, Oulu University Hospital and Medical Research Center Oulu, POB 21, Oulu 90029, Finland

<sup>5</sup> Research Unit of Biomedicine and Biocenter of Oulu, University of Oulu, POB 5000, Oulu 90014, Finland; Oulu University Hospital and Medical Research Center Oulu, POB 21, Oulu 90029, Finland

<sup>6</sup> Department of Gastroenterology and Metabolism, Poznan University of Medical Sciences, ul. Szpitalna 27/33, 60-572, Poznan, Poland

**Table S1.** Characteristics of the colorectal cancer patients

|                                                       | All patients (n=356) | Patients with serum cytokine measurements (n=148) | Patients without serum cytokine measurements (n=208) |
|-------------------------------------------------------|----------------------|---------------------------------------------------|------------------------------------------------------|
| <b>Age</b> , mean (SD)                                | 68.2 (11.8)          | 66.7 (11.1)                                       | 69.2 (12.2)                                          |
| <b>Gender</b>                                         |                      |                                                   |                                                      |
| Male                                                  | 190 (53.4%)          | 80 (54.1%)                                        | 110 (52.9%)                                          |
| Female                                                | 166 (46.6%)          | 68 (45.9%)                                        | 98 (47.1%)                                           |
| <b>Tumor location</b>                                 |                      |                                                   |                                                      |
| Proximal colon                                        | 123 (34.6%)          | 48 (32.4%)                                        | 75 (36.1%)                                           |
| Distal colon                                          | 73 (20.5%)           | 28 (18.9%)                                        | 45 (21.6%)                                           |
| Rectum                                                | 160 (44.9%)          | 72 (48.6%)                                        | 88 (42.3%)                                           |
| <b>Preoperative radiotherapy or chemoradiotherapy</b> |                      |                                                   |                                                      |
| No                                                    | 286 (80.3%)          | 116 (78.4%)                                       | 170 (81.7%)                                          |
| Yes                                                   | 70 (19.7%)           | 32 (21.6%)                                        | 38 (18.3%)                                           |
| <b>WHO grade</b>                                      |                      |                                                   |                                                      |
| Grade 1                                               | 79 (22.3%)           | 21 (14.3%)                                        | 58 (28%)                                             |
| Grade 2                                               | 229 (64.7%)          | 108 (73.5%)                                       | 121 (58.5%)                                          |
| Grade 3                                               | 46 (13%)             | 18 (12.2%)                                        | 28 (13.5%)                                           |
| <b>TNM Stage</b>                                      |                      |                                                   |                                                      |
| Stage I                                               | 81 (22.8%)           | 27 (18.4%)                                        | 54 (26%)                                             |
| Stage II                                              | 113 (31.8%)          | 55 (37.4%)                                        | 58 (27.9%)                                           |
| Stage III                                             | 116 (32.7%)          | 45 (30.6%)                                        | 71 (34.1%)                                           |
| Stage IV                                              | 45 (12.7%)           | 20 (13.6%)                                        | 25 (12%)                                             |
| <b>Blood platelet count</b> , ( $10^9/L$ ), mean (SD) | 294.9 (93.4)         | 303.5 (97.1)                                      | 288.8 (90.4)                                         |
| <b>Aspirin use</b>                                    |                      |                                                   |                                                      |
| No                                                    | 271 (76.1%)          | 111 (75%)                                         | 160 (76.9%)                                          |
| Yes                                                   | 85 (23.9%)           | 37 (25%)                                          | 48 (23.1%)                                           |

**Table S2. Antibodies and protocols used in immunohistochemistry**

| Cell type                | Antigen             | Antigen retrieval | Antibody type    | Manufacturer      | Clone     | Code         | Dilution | Incubation | Antibody visualization |
|--------------------------|---------------------|-------------------|------------------|-------------------|-----------|--------------|----------|------------|------------------------|
| T cells                  | CD3                 | Tris-EDTA pH9*    | mouse monoclonal | Novocastra        | PS1       | NCL-CD3-PS1  | 1:50     | 30 min     | EnVision               |
| Cytotoxic T cells        | CD8                 | Tris-EDTA pH9*    | mouse monoclonal | Novocastra        | 4B11      | NCL-CD8-4B11 | 1:200    | 30 min     | EnVision               |
| Regulatory T cells       | FoxP3               | Tris-EDTA pH9*    | mouse monoclonal | Abcam             | 236A/E7   | ab20034      | 1:100    | 30 min     | EnVision               |
| Neutrophils              | Neutrophil elastase | Tris-EDTA pH9*    | mouse monoclonal | DAKO              | NP57      | M0752        | 1:200    | 30 min     | EnVision               |
| Mast cells               | Mast cell tryptase  | Tris-EDTA pH9*    | mouse monoclonal | DAKO              | AA1       | M7052        | 1:2000   | 30 min     | EnVision               |
| MLH1 <sup>+</sup> cells  | MLH1                | Tris-EDTA pH9*    | mouse monoclonal | Novocastra        | ES05      | NCL-L-MLH1   | 1:100    | 90 min     | EnVision               |
| MSH2 <sup>+</sup> cells  | MSH2                | Tris-EDTA pH9*    | mouse monoclonal | BD-Pharmingen     | G219-1129 | 556349       | 1:200    | 60 min     | EnVision               |
| MSH6 <sup>+</sup> cells  | MSH6                | Tris-EDTA pH9*    | mouse monoclonal | BD-Pharmingen     | 44/MSH6   | 610919       | 1:150    | 90min      | EnVision               |
| PMS2 <sup>+</sup> cells  | PMS2                | Tris-EDTA pH9*    | mouse monoclonal | BD-Pharmingen     | A16-4     | 556415       | 1:100    | 90 min     | EnVision               |
| BRAF V600E mutated cells | BRAF V600E          | Ventana CC1       | mouse monoclonal | Spring Bioscience | VE1       | E19292       | 1:2000   | 32 min     | Optiview               |

\*In a microwave oven at 800W for 2 min and at 150W for 15 min.

**Table S3.** Correlation between blood platelet count and systemic inflammatory markers.

| Variable      | N (unadjusted,<br>adjusted) | Unadjusted |         | Adjusted |         |
|---------------|-----------------------------|------------|---------|----------|---------|
|               |                             | Pearson r  | p value | Beta     | p value |
| Serum CRP     | 337, 335                    | 0.266      | <0.001  | 0.149    | 0.003   |
| Serum Albumin | 356, 354                    | -0.104     | 0.050   | 0.019    | 0.694   |

Blood platelet count and serum CRP was logarithmically transformed because of positive skewness. The correlations were adjusted for tumor location (colon vs. rectum), preoperative radiotherapy or chemoradiotherapy, tumor stage variables (T1-2 vs. T3-4; N0 vs. N1-2; M0 vs. M1), patient age, patient gender, and blood hemoglobin levels with multiple linear regression. Abbreviations: CRP: C-reactive protein.

**Table S4.** Relationships between aspirin use and clinicopathological characteristics.

| Variable (n)                                                                    | No aspirin  | Aspirin    | P value |
|---------------------------------------------------------------------------------|-------------|------------|---------|
| <b>Age</b>                                                                      |             |            |         |
| <65 (n=130)                                                                     | 118 (90.8%) | 12 (9.2%)  | <0.001  |
| ≥65 (n=226)                                                                     | 153 (67.7%) | 73 (32.3%) |         |
| <b>Sex</b>                                                                      |             |            |         |
| Male (n=190)                                                                    | 142 (74.7%) | 48 (25.3%) | 0.511   |
| Female (n=166)                                                                  | 129 (77.7%) | 37 (22.3%) |         |
| <b>Body mass index</b>                                                          |             |            |         |
| <25 (n=123)                                                                     | 96 (78.0%)  | 27 (22.0%) | 0.332   |
| 25-30 (n=146)                                                                   | 112 (76.7%) | 34 (23.3%) |         |
| >30 (n=78)                                                                      | 54 (69.2%)  | 24 (30.8%) |         |
| <b>Location of tumor</b>                                                        |             |            |         |
| Proximal colon (n=123)                                                          | 91 (74.0%)  | 32 (26.0%) | 0.160   |
| Distal colon (n=73)                                                             | 51 (69.9%)  | 22 (30.1%) |         |
| Rectum (n=160)                                                                  | 129 (80.6%) | 31 (19.4%) |         |
| <b>Preoperative radiotherapy or chemoradiotherapy in rectal cancer patients</b> |             |            |         |
| No (n=91)                                                                       | 67 (73.6%)  | 24 (26.4%) | 0.010   |
| Yes (n=69)                                                                      | 62 (89.9%)  | 7 (10.1%)  |         |
| <b>WHO grade</b>                                                                |             |            |         |
| Grade 1 (n=79)                                                                  | 59 (74.7%)  | 20 (25.3%) | 0.871   |
| Grade 2 (n=229)                                                                 | 176 (76.9%) | 53 (23.1%) |         |
| Grade 3 (n=46)                                                                  | 34 (73.9%)  | 12 (26.1%) |         |
| <b>TNM Stage</b>                                                                |             |            |         |
| Stage I (n=81)                                                                  | 62 (76.5%)  | 19 (23.5%) | 0.629   |
| Stage II (n=113)                                                                | 82 (72.6%)  | 31 (27.4%) |         |
| Stage III (n=116)                                                               | 89 (76.7%)  | 27 (23.3%) |         |
| Stage IV (n=45)                                                                 | 37 (82.2%)  | 8 (17.8%)  |         |
| <b>Primary tumor</b>                                                            |             |            |         |
| T1 (n=15)                                                                       | 10 (66.7%)  | 5 (33.3%)  | 0.575   |
| T2 (n=89)                                                                       | 69 (77.5%)  | 20 (22.5%) |         |
| T3 (n=225)                                                                      | 169 (75.1%) | 56 (24.9%) |         |
| T4 (n=26)                                                                       | 22 (84.6%)  | 4 (15.4%)  |         |
| <b>Lymph node metastasis</b>                                                    |             |            |         |
| N0 (n=201)                                                                      | 150 (74.6%) | 51 (25.4%) | 0.026   |
| N1 (n=96)                                                                       | 68 (70.8%)  | 28 (29.2%) |         |
| N2 (n=57)                                                                       | 51 (89.5%)  | 6 (10.5%)  |         |
| <b>Distant Metastasis</b>                                                       |             |            |         |
| M0 (n=311)                                                                      | 234 (75.2%) | 77 (24.8%) | 0.305   |
| M1 (n=45)                                                                       | 37 (82.2%)  | 8 (17.8%)  |         |
| <b>Lymphatic invasion</b>                                                       |             |            |         |
| No (n=192)                                                                      | 148 (77.1%) | 44 (22.9%) | 0.748   |
| Yes (n=160)                                                                     | 121 (75.6%) | 39 (24.4%) |         |
| <b>Blood vessel invasion</b>                                                    |             |            |         |
| No (n=293)                                                                      | 225 (76.8%) | 68 (23.2%) | 0.715   |

|                                                 |             |            |       |
|-------------------------------------------------|-------------|------------|-------|
| Yes (n=59)                                      | 44 (74.6%)  | 15 (25.4%) |       |
| <b>Mismatch repair (MMR) enzyme status</b>      |             |            |       |
| MMR Proficient (n=315)                          | 242 (76.8%) | 73 (23.2%) | 0.341 |
| MMR Deficient (n=40)                            | 28 (70.0%)  | 12 (30.0%) |       |
| <b>BRAF VE1 immunohistochemistry</b>            |             |            |       |
| Negative (n=322)                                | 248 (77.0%) | 74 (23.0%) | 0.346 |
| Positive (n=33)                                 | 23 (69.7%)  | 10 (30.3%) |       |
| <b>Modified Glasgow Prognostic Score (mGPS)</b> |             |            |       |
| 0 (n=269)                                       | 207 (77.0%) | 62 (23.0%) | 0.201 |
| 1 (n=63)                                        | 49 (77.8%)  | 14 (22.2%) |       |
| 2 (n=8)                                         | 4 (50.0%)   | 4 (50.0%)  |       |
| <b>Anemia</b>                                   |             |            |       |
| No (n=202)                                      | 162 (80.2%) | 40 (19.8%) | 0.039 |
| Yes (n=154)                                     | 109 (70.8%) | 45 (29.2%) |       |
| <b>Anemia category</b>                          |             |            |       |
| No anemia (n=202)                               | 162 (80.2%) | 40 (19.8%) | 0.124 |
| Microcytic anemia (n=43)                        | 32 (74.4%)  | 11 (25.6%) |       |
| Normocytic anemia (n=109)                       | 75 (68.8%)  | 34 (31.2%) |       |
| Macrocytic anemia (n=2)                         | 2 (100.0%)  | 0 (0.0%)   |       |

---

**Table S5.** Relationships between aspirin use, systemic inflammatory markers, and the densities of tumor infiltrating immune cells

| Variable                                                      | No aspirin              | Aspirin                 | P value |
|---------------------------------------------------------------|-------------------------|-------------------------|---------|
| <b>Systemic inflammatory markers</b>                          |                         |                         |         |
| Serum C-reactive protein (mg/L)                               | 2.6 (0.8-8.0)           | 3.4 (0.9-8.8)           | 0.672   |
| Serum albumin (g/L)                                           | 43.0 (41.0-45.0)        | 43.0 (40.0-45.0)        | 0.784   |
| <b>Serum cytokines (pg/mL)</b>                                |                         |                         |         |
| IL-1RA                                                        | 63.7 (38.1-95.5)        | 57.4 (36.9-86.2)        | 0.348   |
| IL-4                                                          | 0.9 (0.7-1.1)           | 0.8 (0.7-0.9)           | 0.086   |
| IL-6                                                          | 4.9 (3.7-8.6)           | 4.1 (3.2-6.8)           | 0.101   |
| IL-7                                                          | 6.1 (4.3-7.8)           | 4.8 (4.0-6.4)           | 0.089   |
| IL-8                                                          | 12.3 (9.0-17.1)         | 11.0 (8.5-12.5)         | 0.117   |
| IL-9                                                          | 9.2 (6.6-13.8)          | 6.5 (4.4-12.7)          | 0.071   |
| IL-12                                                         | 30.0 (14.5-41.0)        | 28.2 (13.3-40.0)        | 0.645   |
| IFN- $\gamma$                                                 | 31.5 (23.9-43.4)        | 26.5 (20.1-36.6)        | 0.131   |
| CXCL10                                                        | 885.2 (677.7-1202.1)    | 939.0 (767.0-1240.9)    | 0.369   |
| CCL2                                                          | 18.0 (12.7-28.1)        | 14.7 (9.7-22.6)         | 0.087   |
| CCL4                                                          | 65.3 (51.2-85.4)        | 63.5 (51.0-76.1)        | 0.484   |
| CCL11                                                         | 131.2 (91.2-180.4)      | 125.5 (97.6-174.3)      | 0.847   |
| PDGF-BB                                                       | 8536.6 (6040.7-11081.4) | 8288.9 (5669.8-11324.0) | 0.808   |
| <b>Tumor infiltrating immune cells (cells/mm<sup>2</sup>)</b> |                         |                         |         |
| CD3 IM                                                        | 520.5 (306.0-791.4)     | 609.3 (330.6-890.9)     | 0.245   |
| CD3 CT                                                        | 387.9 (205.7-671.2)     | 422.0 (235.3-787.3)     | 0.385   |
| CD3 IEL                                                       | 16.9 (6.1-54.2)         | 24.3 (7.0-66.7)         | 0.232   |
| CD8 IM                                                        | 135.5 (49.0-306.5)      | 162.2 (93.1-339.8)      | 0.111   |
| CD8 CT                                                        | 80.3 (25.2-183.2)       | 99.7 (34.3-252.5)       | 0.311   |
| CD8 IEL                                                       | 11.8 (2.7-42.2)         | 12.1 (3.5-50.2)         | 0.425   |
| FoxP3 IM                                                      | 134.0 (63.3-233.0)      | 198.3 (111.8-282.9)     | 0.005   |
| FoxP3 CT                                                      | 130.5 (62.3-246.8)      | 133.7 (76.4-274.6)      | 0.429   |
| Mast cell tryptase IM                                         | 45.1 (27.6-74.4)        | 37.7 (24.4-67.2)        | 0.261   |
| Mast cell tryptase CT                                         | 30.6 (17.6-56.3)        | 30.8 (14.6-47.8)        | 0.211   |
| Neutrophil elastase IM                                        | 27.2 (7.0-125.6)        | 46.8 (12.5-224.9)       | 0.079   |
| Neutrophil elastase CT                                        | 18.2 (5.3-73.0)         | 38.2 (9.7-86.1)         | 0.031   |

Numbers indicate median (IQR). Abbreviations: CCL: Chemokine (C-C motif) ligand; CT: center of tumor; CXCL: Chemokine (C-X-C motif) ligand; IEL: intraepithelial. IFN: interferon IL: interleukin; IM: invasive margin; MCV: mean corpuscular volume; PDGF: Platelet-derived growth factor.

**Table S6.** Univariable analysis of time to recurrence (TTR), cancer-specific survival (CSS), and overall survival (OS) according to blood platelet count with different cut-off points.

|                                                                            | TTR <sup>A</sup> |           |         | CSS <sup>B</sup> |           |         | OS <sup>C</sup> |           |         |
|----------------------------------------------------------------------------|------------------|-----------|---------|------------------|-----------|---------|-----------------|-----------|---------|
|                                                                            | HR               | 95% CI    | p value | HR               | 95% CI    | p value | HR              | 95% CI    | p value |
| <b>Blood platelet count</b>                                                |                  |           |         |                  |           |         |                 |           |         |
| <200×10 <sup>9</sup> /L vs. ≥200×10 <sup>9</sup> /L                        | 0.74             | 0.37-1.50 | 0.404   | 1.37             | 0.59-3.14 | 0.463   | 0.97            | 0.53-1.76 | 0.919   |
| <300×10 <sup>9</sup> /L vs. ≥300×10 <sup>9</sup> /L                        | 0.69             | 0.40-1.18 | 0.174   | 1.15             | 0.73-1.81 | 0.540   | 0.99            | 0.68-1.45 | 0.978   |
| <400×10 <sup>9</sup> /L vs. ≥400×10 <sup>9</sup> /L                        | 0.75             | 0.30-1.87 | 0.540   | 1.41             | 0.76-2.61 | 0.273   | 1.14            | 0.66-1.97 | 0.627   |
| <b>Aspirin use</b>                                                         |                  |           |         |                  |           |         |                 |           |         |
| No vs. Yes                                                                 | 1.19             | 0.69-2.04 | 0.541   | 0.90             | 0.53-1.55 | 0.709   | 1.23            | 0.81-1.84 | 0.330   |
| <b>Blood platelet count (cut-off 300×10<sup>9</sup>/L) and aspirin use</b> |                  |           |         |                  |           |         |                 |           |         |
| Platelet count <300×10 <sup>9</sup> /L, no aspirin (n=155)                 | 1                | reference |         | 1                | reference |         | 1               | reference |         |
| Platelet count <300×10 <sup>9</sup> /L, aspirin (n=57)                     | 0.88             | 0.45-1.70 | 0.697   | 0.59             | 0.27-1.27 | 0.174   | 1.07            | 0.64-1.80 | 0.797   |
| Platelet count ≥300×10 <sup>9</sup> /L, no aspirin (n=116)                 | 0.55             | 0.29-1.05 | 0.069   | 0.91             | 0.54-1.53 | 0.723   | 0.92            | 0.59-1.43 | 0.700   |
| Platelet count ≥300×10 <sup>9</sup> /L, aspirin (n=28)                     | 1.20             | 0.50-2.86 | 0.681   | 1.51             | 0.73-3.13 | 0.270   | 1.43            | 0.76-2.69 | 0.265   |
| <b>Blood platelet count (cut-off 400×10<sup>9</sup>/L) and aspirin use</b> |                  |           |         |                  |           |         |                 |           |         |
| Platelet count <400×10 <sup>9</sup> /L, no aspirin (n=237)                 | 1                | reference |         | 1                | reference |         | 1               | reference |         |
| Platelet count <400×10 <sup>9</sup> /L, aspirin (n=78)                     | 1.16             | 0.66-2.04 | 0.604   | 0.90             | 0.51-1.60 | 0.721   | 1.23            | 0.80-1.89 | 0.354   |
| Platelet count ≥400×10 <sup>9</sup> /L, no aspirin (n=34)                  | 0.74             | 0.27-2.07 | 0.569   | 1.36             | 0.69-2.67 | 0.380   | 1.15            | 0.62-2.12 | 0.652   |
| Platelet count ≥400×10 <sup>9</sup> /L, aspirin (n=7)                      | 1.00             | 0.14-7.29 | 0.998   | 1.49             | 0.36-6.12 | 0.582   | 1.52            | 0.48-4.84 | 0.477   |

<sup>A</sup> n=306; median follow-up time 60.4 months (IQR 25.0-79.8); 64 (20.9%) events; 50 (14.0%) cases excluded from the analysis because the operation was not radical or no follow-up data available.

<sup>B</sup>n=356; median follow-up time 64.5 months (IQR 37.3-85.6); 77 (21.6%) events; 0 (0.0%) cases excluded from the analysis because no follow-up data available.

<sup>C</sup>n=356; median follow-up time 64.5 months (IQR 37.3-85.6); 114 (32.0%) events; 0 (0.0%) cases excluded from the analysis because no follow-up data available.

Abbreviations: CI: confidence interval; CSS: cancer specific survival; HR: hazard ratio; OS: overall survival; TTR: time to recurrence.



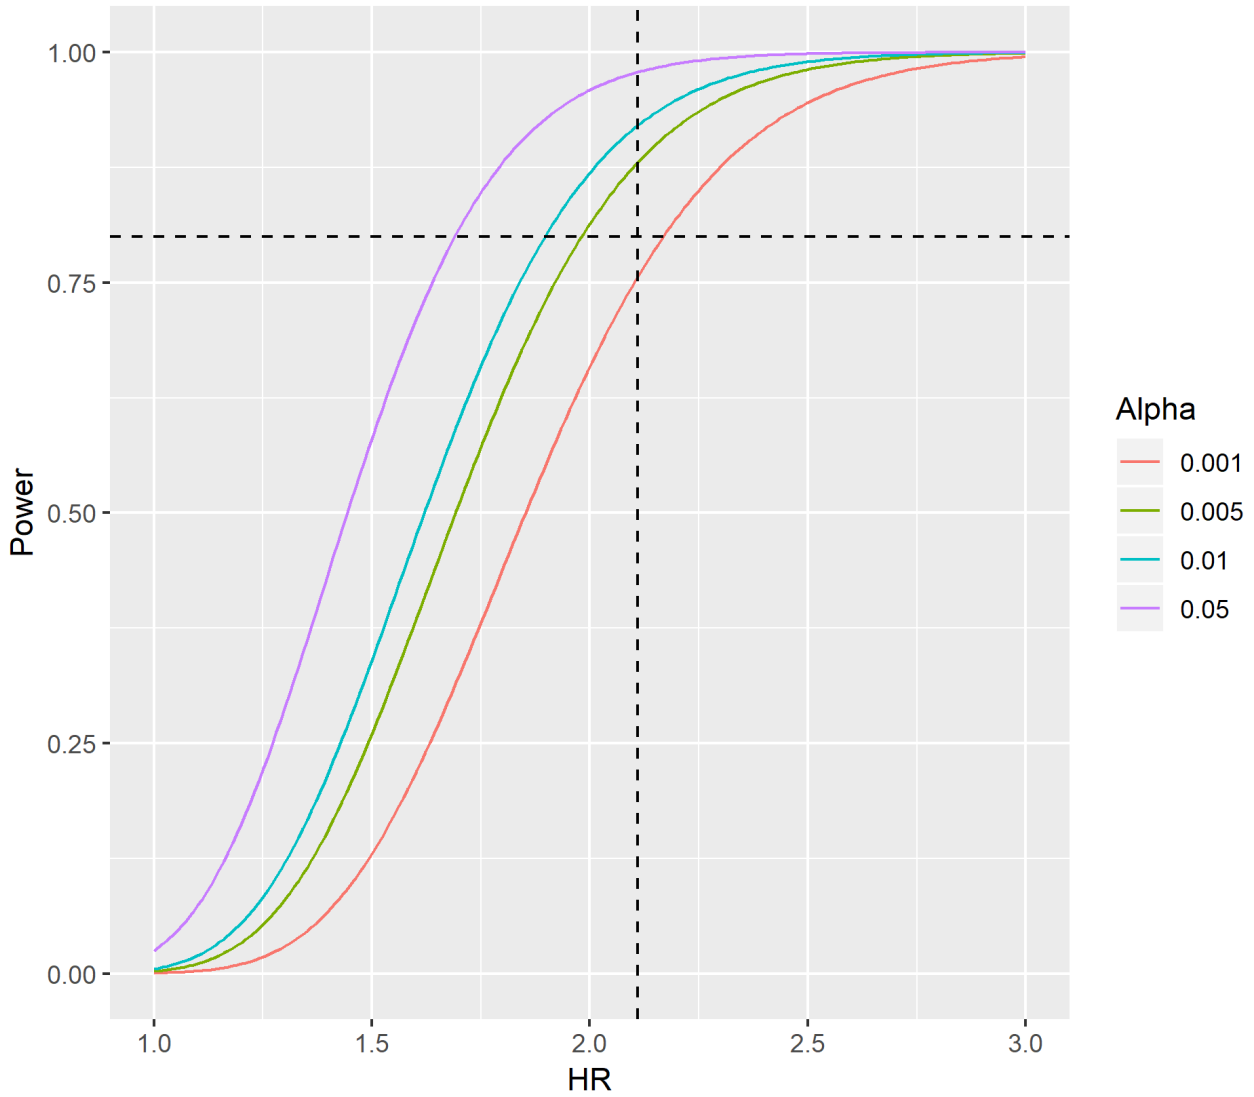

**Fig. S1.** Estimation of statistical power with different expected hazard ratios (HR) and  $\alpha$  levels and in overall survival analysis. Based on the model of Schoenfeld.<sup>1</sup> Assumptions: sample size 356, proportion of patients in the high-risk group 0.5, events in 114 (32.0%) of patients. Potential competing interests were not considered. Horizontal line represents power level of 0.80 ( $\beta$  level 0.20) and vertical line represents expected HR of 2.11, based on a recent meta-analysis.<sup>2</sup>

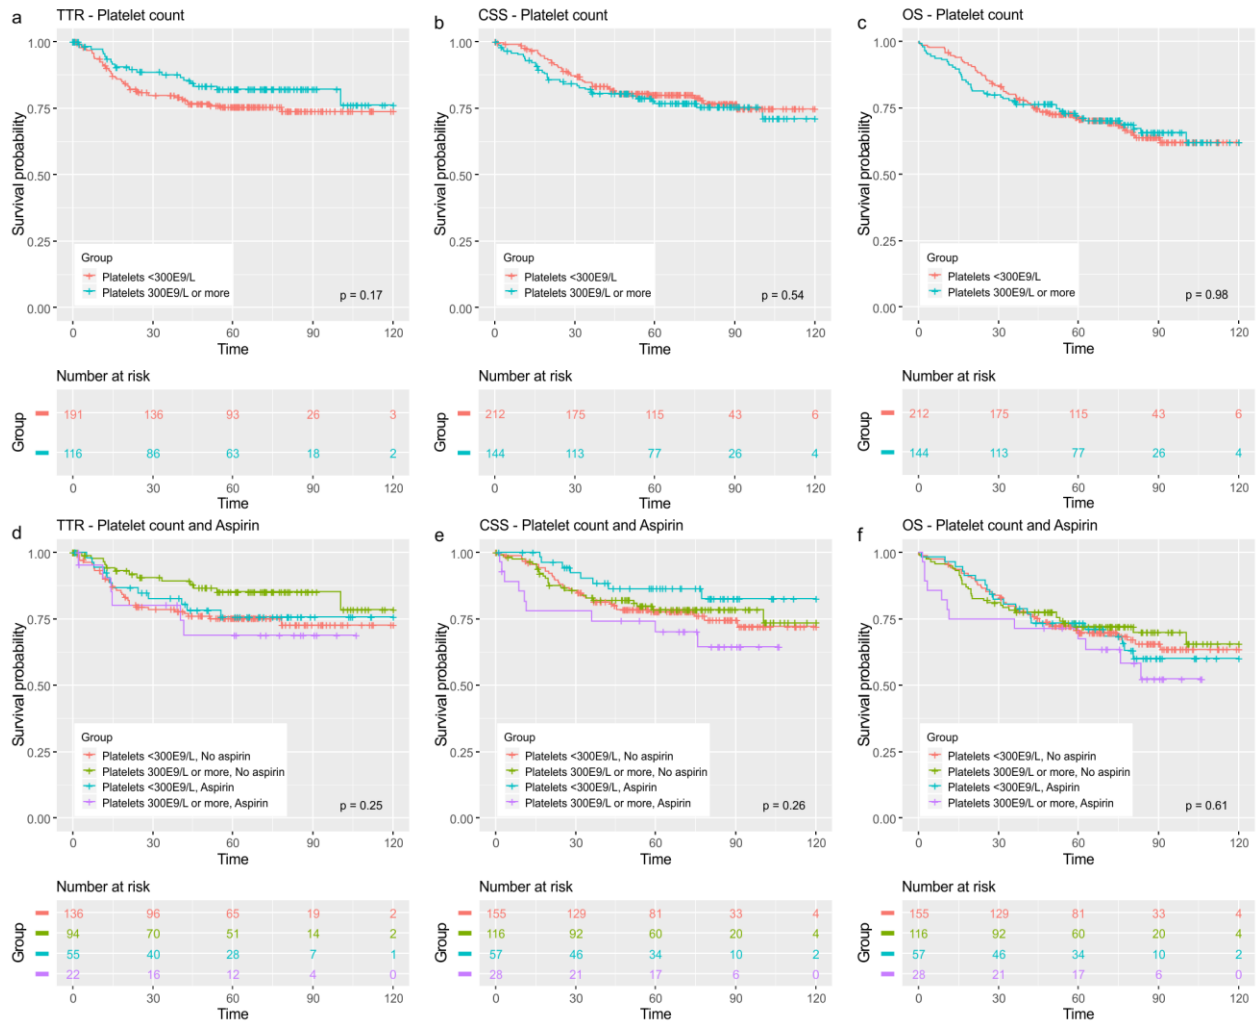

**Fig. S2.** Platelet count, aspirin use, and colorectal cancer survival with  $300 \times 10^9/L$  as the cut-off value for platelet count. a-c. Kaplan-Meier curves showing the relationships between blood platelet count and time to recurrence (TTR), cancer specific survival (CSS), and overall survival (OS). d-f. Kaplan-Meier curves showing the relationships between combined classification of blood platelet count and aspirin use and TTR, CSS, and OS.

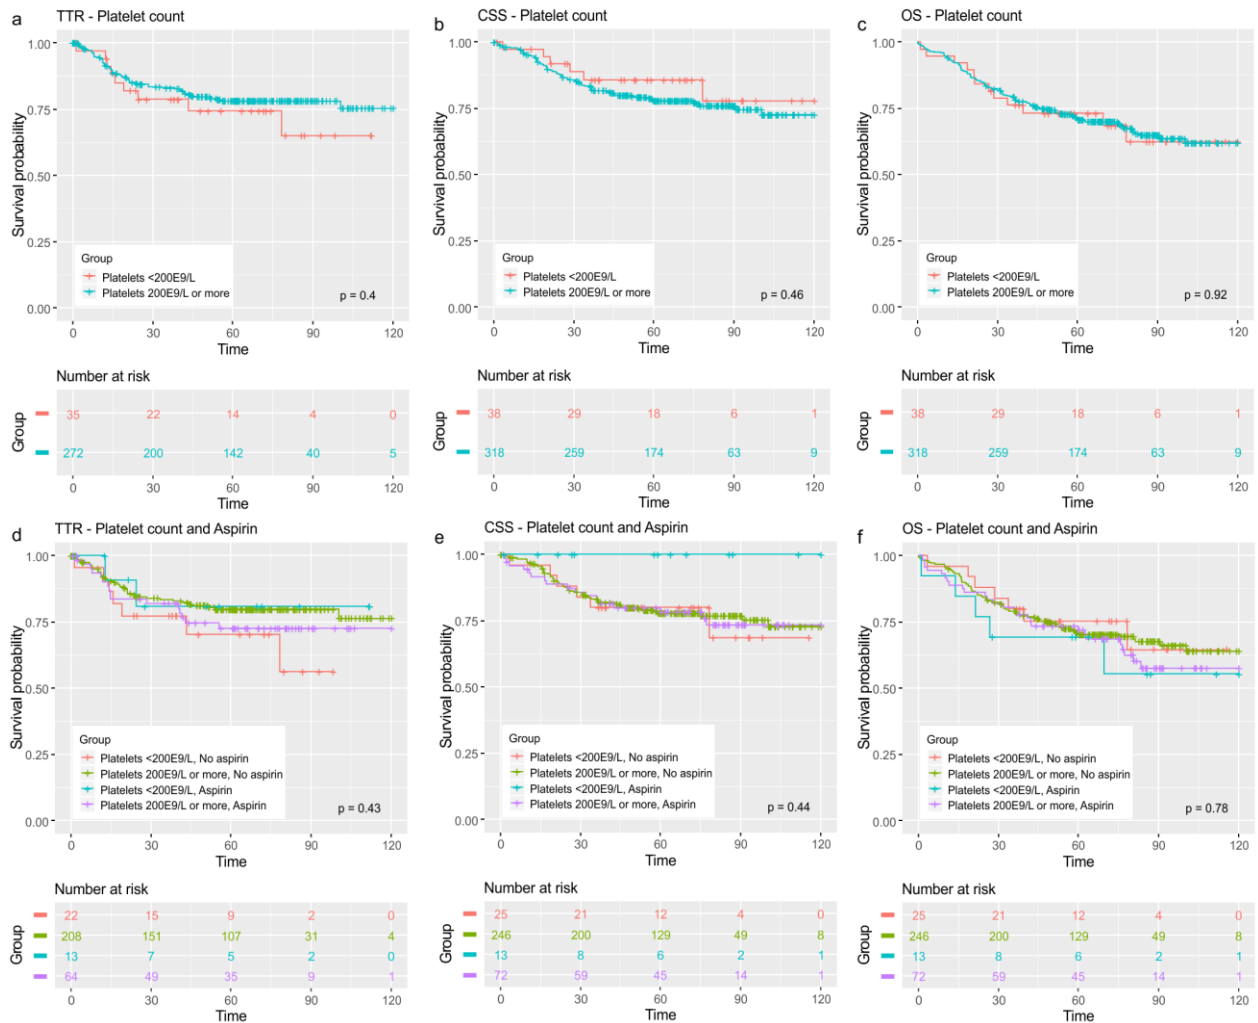

**Fig. S3.** Platelet count, aspirin use, and colorectal cancer survival with  $200 \times 10^9/L$  as the cut-off value for platelet count. a-c. Kaplan-Meier curves showing the relationships between blood platelet count and time to recurrence (TTR), cancer specific survival (CSS), and overall survival (OS). d-f. Kaplan-Meier curves showing the relationships between combined classification of blood platelet count and aspirin use and TTR, CSS, and OS.

## References

1. Schoenfeld DA. Sample-size formula for the proportional-hazards regression model. *Biometrics* 1983;39:499–503.
2. Rao X-D, Zhang H, Xu Z-S, Cheng H, Shen W, Wang X-P. Poor prognostic role of the pretreatment platelet counts in colorectal cancer: A meta-analysis. *Medicine (Baltimore)* 2018;97:e10831.
